# Supplementary material for: Anomalous ground-state proton transfer of 4′-N,N-diethylamino-3-hydroxyflavone in ionic liquids of imidazolium-based cations with tetrafluoroborate
Source: Royal Society of Chemistry journal article supplement (doi:10.1039/c3cc40943k), 2013-01-01
Supplement: c3cc40943k.pdf [file c3cc40943k.pdf]

## Supporting Information

Structures and abbreviations of cations and anions used in this study.

### Cation

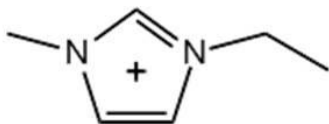

[EMIm]<sup>+</sup>: 1-ethyl-3-methylimidazolium

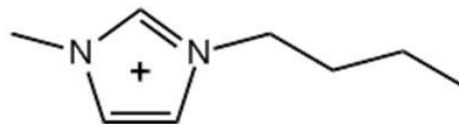

[BMIm]<sup>+</sup>: 1-butyl-3-methylimidazolium

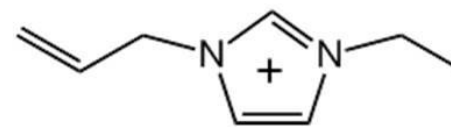

[AEM]<sup>+</sup>: 1-allyl-3-ethylimidazolium

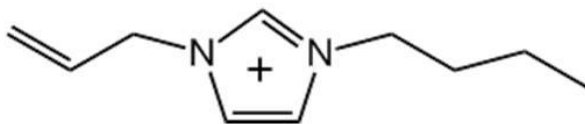

[ABIm]<sup>+</sup>: 1-allyl-3-butylimidazolium

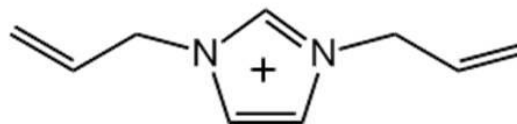

[AAIm]<sup>+</sup>: 1,3-diallylimidazolium

## Anion

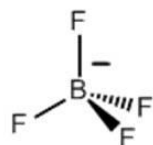

[BF<sub>4</sub>]<sup>-</sup>: tetrafluoroborate

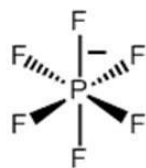

[PF<sub>6</sub>]<sup>-</sup>: hexafluorophosphate

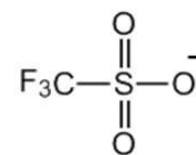

[TfO]<sup>-</sup>: trifluoromethanesulfonate

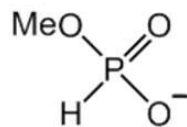

[(MeO)(H)PO<sub>2</sub>]<sup>-</sup>: methylphosphonate

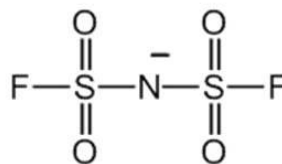

[FSA]<sup>-</sup>: bis(fluorosulfonyl)amide

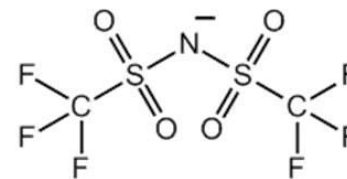

[NTf<sub>2</sub>]<sup>-</sup>: bis(trifluoromethanesulfonyl)amide

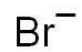

bromide

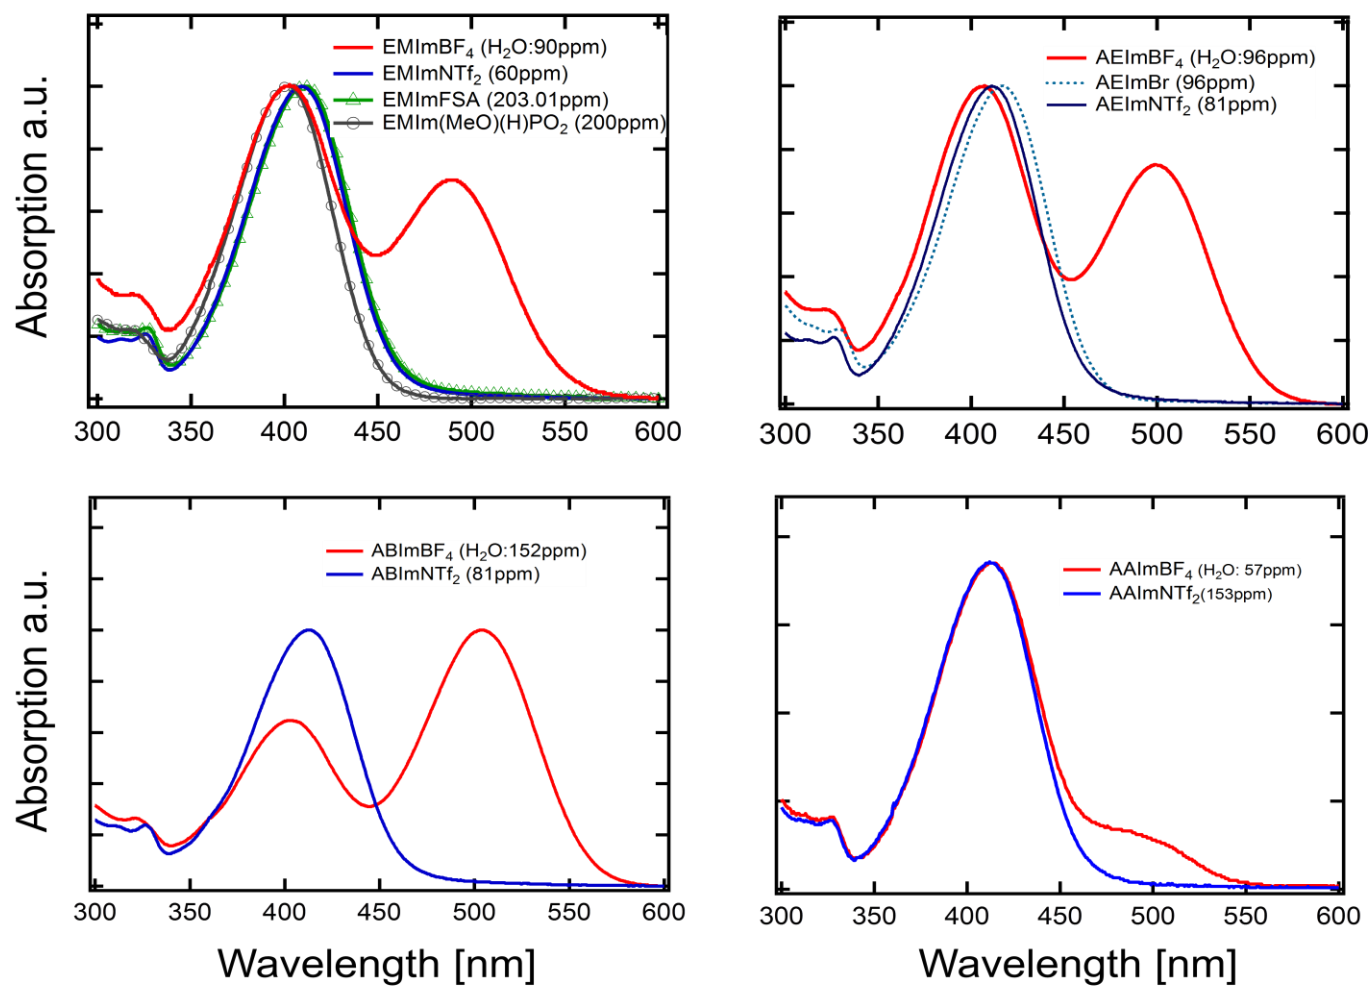

**Fig. S1.** Absorption spectra of DEAHF in RTILs. The water contents of each solution are showed the inset of figures respectively.

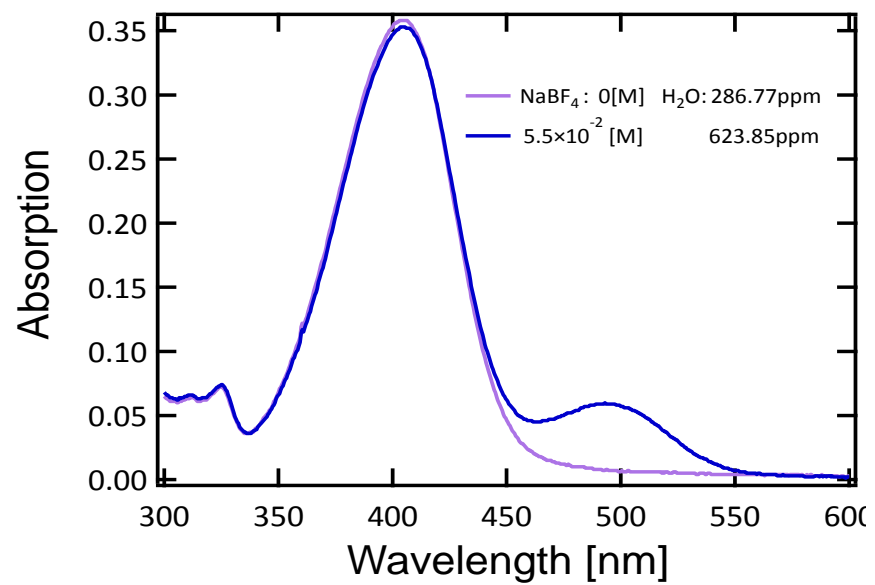

Fig. S2. Absorption spectra of DEAHF in acetonitrile adding NaBF<sub>4</sub> solution. The water and NaBF<sub>4</sub> contents of each solution are showed the inset of figure.
